# Supplementary material for: The Mutual Contribution of 3-NT, IL-18, Albumin, and Phosphate Foreshadows Death of Hemodialyzed Patients in a 2-Year Follow-Up
Source: MDPI journal article supplement (doi:10.3390/antiox11020355), 2022-02-11
Supplement: s1 [file s1]

Correlations for all selected variables within the hemodialyzed patients (the lower triangle)  
and within the control group (the upper triangle)

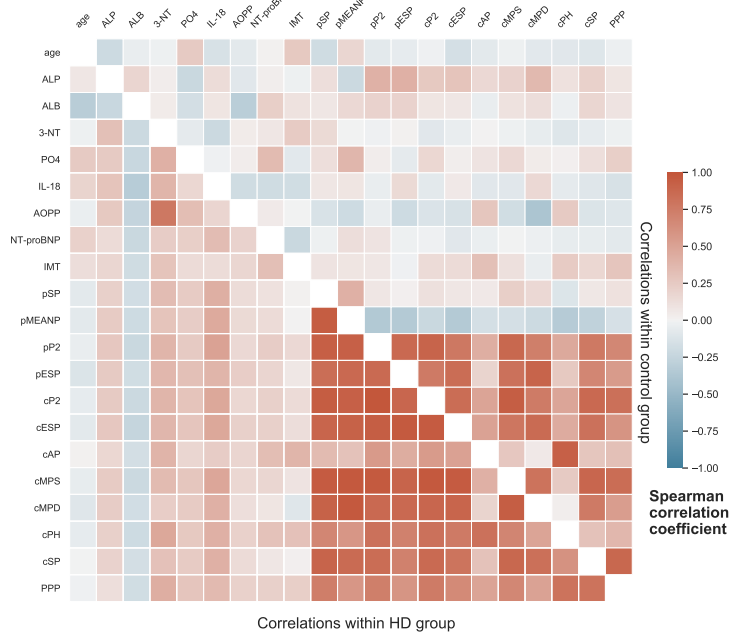

Figure S1: Spearman correlation results heat map for hemodialyzed patients (lower triangle) and control group (upper triangle). Positive correlations ( $\rho > 0$ ) are marked with red color and negative ( $\rho < 0$ ) are presented as blue. Color intensity reflects of correlation coefficient ( $\rho$ ) (the more intense color is, the more away from 0 is the correlation coefficient).

Table S1: Spearman correlation test results for all variables that significantly differentiate groups HD-A and HD-D.

| Variable 1 | Variable 2 | Spearman $\rho$ | p-value     |
|------------|------------|-----------------|-------------|
| 3-NT       | AOPP       | 0.7738          | $< 10^{-4}$ |
| IL-18      | pP2        | 0.5015          | $< 10^{-4}$ |
| pSP        | pMEANP     | 0.9463          | $< 10^{-4}$ |
| pSP        | pP2        | 0.9345          | $< 10^{-4}$ |
| pSP        | pESP       | 0.8361          | $< 10^{-4}$ |
| pSP        | cP2        | 0.9517          | $< 10^{-4}$ |
| pSP        | cESP       | 0.8976          | $< 10^{-4}$ |
| pSP        | cMPS       | 0.9601          | $< 10^{-4}$ |
| pSP        | cMPD       | 0.9183          | $< 10^{-4}$ |
| pSP        | cPH        | 0.6832          | $< 10^{-4}$ |
| pSP        | cSP        | 0.9042          | $< 10^{-4}$ |
| pSP        | PPP        | 0.7365          | $< 10^{-4}$ |
| pMEANP     | pP2        | 0.9250          | $< 10^{-4}$ |
| pMEANP     | pESP       | 0.8705          | $< 10^{-4}$ |
| pMEANP     | cP2        | 0.9270          | $< 10^{-4}$ |
| pMEANP     | cESP       | 0.9194          | $< 10^{-4}$ |
| pMEANP     | cMPS       | 0.9759          | $< 10^{-4}$ |
| pMEANP     | cMPD       | 0.9737          | $< 10^{-4}$ |
| pMEANP     | cPH        | 0.5821          | $< 10^{-4}$ |
| pMEANP     | cSP        | 0.8549          | $< 10^{-4}$ |
| pMEANP     | PPP        | 0.5794          | $< 10^{-4}$ |
| pP2        | pESP       | 0.8646          | $< 10^{-4}$ |
| pP2        | cP2        | 0.9889          | $< 10^{-4}$ |
| pP2        | cESP       | 0.9424          | $< 10^{-4}$ |
| pP2        | cAP        | 0.5617          | $< 10^{-4}$ |
| pP2        | cMPS       | 0.9613          | $< 10^{-4}$ |
| pP2        | cMPD       | 0.8688          | $< 10^{-4}$ |
| pP2        | cPH        | 0.8139          | $< 10^{-4}$ |
| pP2        | cSP        | 0.8440          | $< 10^{-4}$ |
| pP2        | PPP        | 0.7314          | $< 10^{-4}$ |
| pESP       | cP2        | 0.8896          | $< 10^{-4}$ |
| pESP       | cESP       | 0.9676          | $< 10^{-4}$ |
| pESP       | cMPS       | 0.9013          | $< 10^{-4}$ |
| pESP       | cMPD       | 0.8745          | $< 10^{-4}$ |
| pESP       | cPH        | 0.7126          | $< 10^{-4}$ |
| pESP       | cSP        | 0.7149          | $< 10^{-4}$ |
| pESP       | PPP        | 0.5937          | $< 10^{-4}$ |
| cP2        | cESP       | 0.9558          | $< 10^{-4}$ |
| cP2        | cAP        | 0.5486          | $< 10^{-4}$ |
| cP2        | cMPS       | 0.9718          | $< 10^{-4}$ |
| cP2        | cMPD       | 0.8839          | $< 10^{-4}$ |
| cP2        | cPH        | 0.8174          | $< 10^{-4}$ |
| cP2        | cSP        | 0.8596          | $< 10^{-4}$ |
| cP2        | PPP        | 0.7559          | $< 10^{-4}$ |
| cESP       | cAP        | 0.5143          | $< 10^{-4}$ |
| cESP       | cMPS       | 0.9589          | $< 10^{-4}$ |
| cESP       | cMPD       | 0.8961          | $< 10^{-4}$ |
| cESP       | cPH        | 0.7613          | $< 10^{-4}$ |
| cESP       | cSP        | 0.8015          | $< 10^{-4}$ |
| cESP       | PPP        | 0.6613          | $< 10^{-4}$ |
| cAP        | cPH        | 0.8142          | $< 10^{-4}$ |
| cMPS       | cMPD       | 0.9453          | $< 10^{-4}$ |
| cMPS       | cPH        | 0.6937          | $< 10^{-4}$ |
| cMPS       | SP         | 0.8758          | $< 10^{-4}$ |
| cMPS       | PPP        | 0.6788          | $< 10^{-4}$ |
| cMPD       | cSP        | 0.8224          | $< 10^{-4}$ |
| cMPD       | PPP        | 0.5040          | $< 10^{-4}$ |
| cPH        | cSP        | 0.6077          | $< 10^{-4}$ |
| cPH        | PPP        | 0.8114          | $< 10^{-4}$ |
| cSP        | PPP        | 0.8095          | $< 10^{-4}$ |
